# Supplementary material for: The hidden value of trees: Quantifying the ecosystem services of tree lineages and their major threats across the contiguous US
Source: PLOS journal article supplement (doi:10.1371/journal.pstr.0000010), 2022-04-05
Supplement: S6 (10.1371/journal.pstr.0000010.s006) [file journal.pstr.0000010.s006]

**S3 Table**

Sources of stumpage prices used to calculate the annual net value of wood production in the continental US.

| <b>State</b>   | <b>Source</b>                                                               |
|----------------|-----------------------------------------------------------------------------|
| Alabama        | Timber Mart-South                                                           |
| Arizona        | U.S. Forest Service Southwestern Region                                     |
| Arkansas       | Timber Mart-South                                                           |
| California     | California State Board of Equalization                                      |
| Colorado       | U.S. Forest Service Rocky Mountain Region                                   |
| Connecticut    | University of Massachusetts Extension                                       |
| Delaware       | University of Maryland Extension                                            |
| Florida        | Timber Mart-South                                                           |
| Georgia        | Timber Mart-South                                                           |
| Idaho          | Idaho Department of Lands                                                   |
| Illinois       | University of Illinois Extension                                            |
| Indiana        | Purdue Extension                                                            |
| Iowa           | No Data                                                                     |
| Kansas         | No Data                                                                     |
| Kentucky       | Kentucky Division of Forestry                                               |
| Louisiana      | Louisiana Department of Agriculture & Forestry                              |
| Maine          | Maine Forest Service                                                        |
| Maryland       | University of Maryland Extension                                            |
| Massachusetts  | University of Massachusetts Extension                                       |
| Michigan       | Michigan Department of Natural Resources                                    |
| Minnesota      | Minnesota Department of Natural Resources                                   |
| Mississippi    | Mississippi State University Extension                                      |
| Missouri       | Missouri Department of Conservation                                         |
| Montana        | U.S. Forest Service Northern Region                                         |
| Nebraska       | Nebraska Forest Service                                                     |
| Nevada         | No Data                                                                     |
| New Hampshire  | New Hampshire Department of Revenue                                         |
| New Jersey     | No Data                                                                     |
| New Mexico     | U.S. Forest Service Southwestern Region                                     |
| New York       | <a href="#">New York Department of Environmental Conservation (Website)</a> |
| North Carolina | Timber Mart-South                                                           |
| North Dakota   | No Data                                                                     |
| Ohio           | Ohio State University Extension                                             |
| Oklahoma       | Data extrapolated from Texas price data                                     |
| Oregon         | Oregon Department of Forestry                                               |
| Pennsylvania   | Penn State Extension                                                        |
| Rhode Island   | University of Massachusetts Extension                                       |
| South Carolina | Timber Mart-South                                                           |
| South Dakota   | <a href="#">U.S. Forest Service Rocky Mountain Region (Website)</a>         |
| Tennessee      | Timber Mart-South                                                           |
| Texas          | Timber Mart-South                                                           |
| Utah           | U.S. Forest Service Intermountain Region                                    |
| Vermont        | Vermont Department of Forests                                               |
| Virginia       | Timber Mart-South                                                           |
| Washington     | <a href="#">Washington State Department of Revenue (Website)</a>            |
| West Virginia  | West Virginia                                                               |
| Wisconsin      | <a href="#">Wisconsin Department of Natural Resources (Website)</a>         |
| Wyoming        | U.S. Forest Service Intermountain Region                                    |
