# Supplementary material for: The hidden value of trees: Quantifying the ecosystem services of tree lineages and their major threats across the contiguous US
Source: PLOS journal article supplement (doi:10.1371/journal.pstr.0000010), 2022-04-05
Supplement: S11 (10.1371/journal.pstr.0000010.s011) [file journal.pstr.0000010.s011]

**S8 Table**

Ordinary least squares estimate of a county's annual air quality regulation value per square mile regresses on the county's standardized distance to nearest large urban area(s) and the county's standardized carbon storage as of 2010-2012 per square mile (as a proxy for tree biomass abundance). Column (I) gives results of a model with standardized distance to the nearest *large* urban area, column (II) gives results with standardized average distance to nearest *five large* urban areas, column (III) gives results with standardized distance to the nearest urban area (regardless of size), and column (IV) gives results with standardized average distance to nearest *five* urban areas (regardless of size).

|                                                             | (I)                | (II)                | (III)              | (IV)               |
|-------------------------------------------------------------|--------------------|---------------------|--------------------|--------------------|
| <b>Intercept</b>                                            | 26127***<br>(1312) | 26127*** (1304)     | 26127 (1316)       | 26127 (1314)       |
| <b>Standardized distance to nearest large urban area(s)</b> | -8200***<br>(1360) | -11649***<br>(1376) | -5692***<br>(1328) | -7004***<br>(1356) |
| <b>Standardized carbon storage value per square mile</b>    | 16050***<br>(1360) | 14494*** (1376)     | 17431***<br>(1328) | 16485***<br>(1356) |
| <b>N</b>                                                    | 2925               | 2925                | 2925               | 2925               |
| <b>R<sup>2</sup></b>                                        | 0.073              | 0.084               | 0.067              | 0.070              |
